# Supplementary material
Source: PubMed Central journal article supplement (PMC3562732)

Supplemental Figure -S1 (Emmert-Buck)

Affymetrix Scatter Plot 1µg/1ng

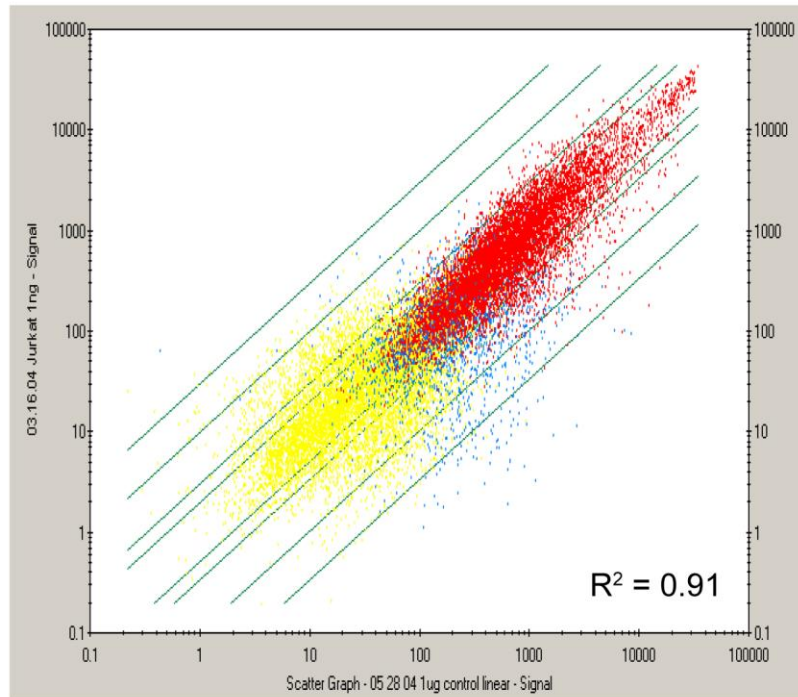

Supplement: mmc1.pdf [file mmc1.pdf]

Supplemental Figure-S2 (Emmert-Buck)

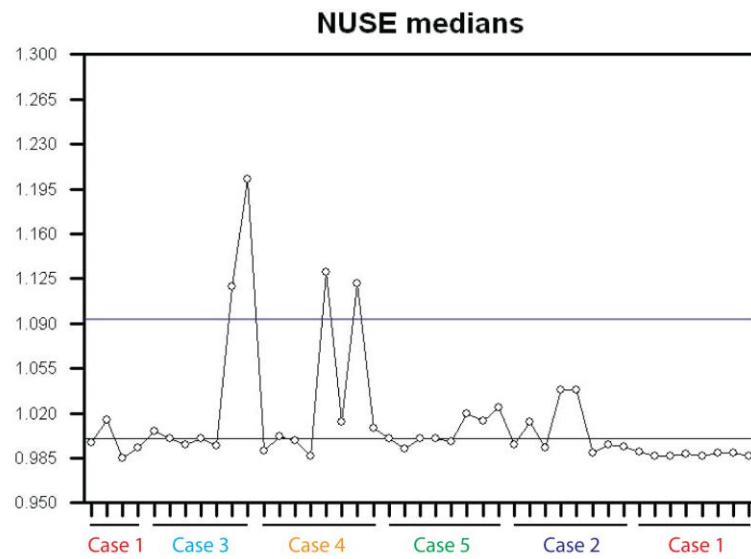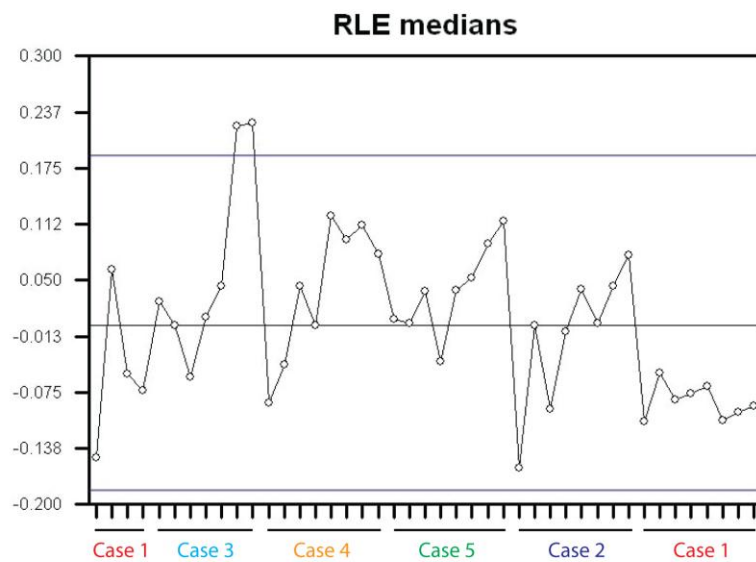

Supplement: mmc2.pdf [file mmc2.pdf]

Supplemental Figure-S3 (Emmert-Buck)

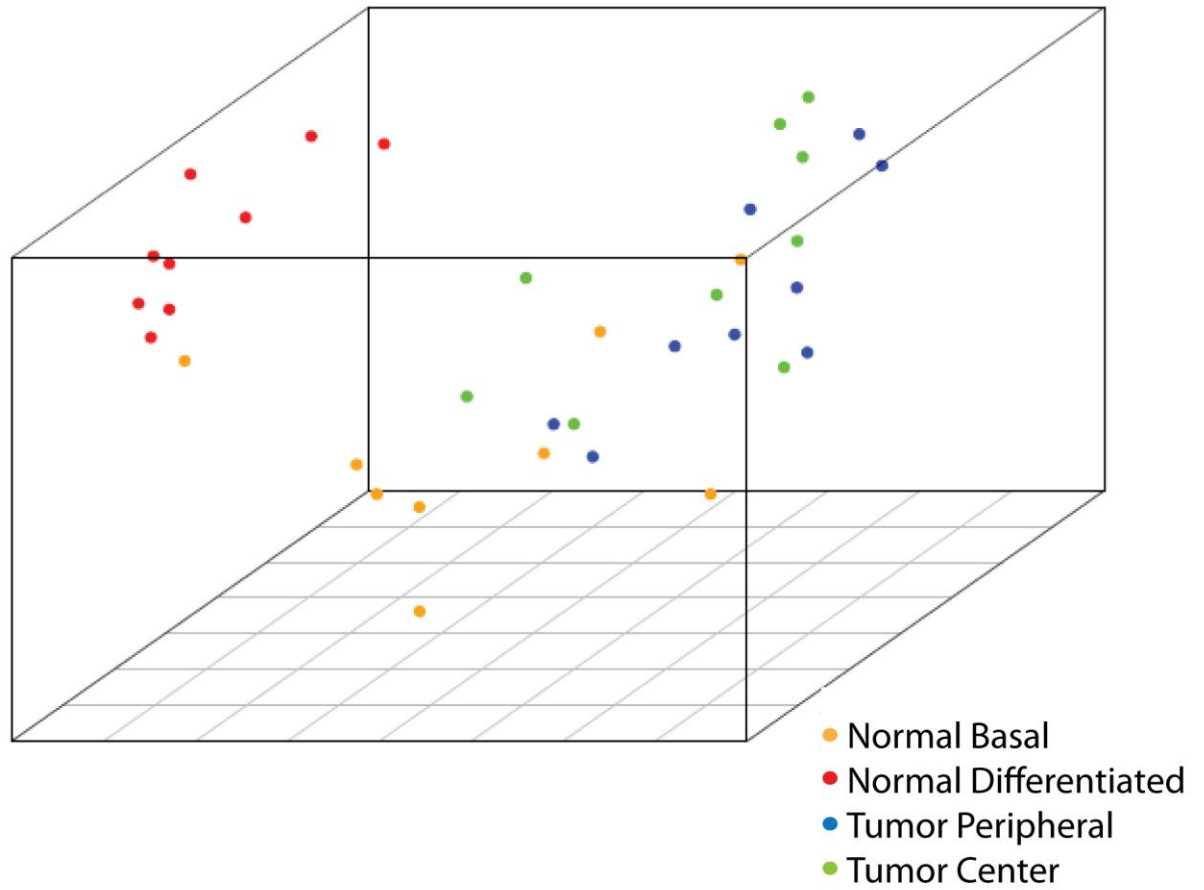

Supplement: mmc3.pdf [file mmc3.pdf]

Supplemental Figure -S4 (Emmert-Buck)

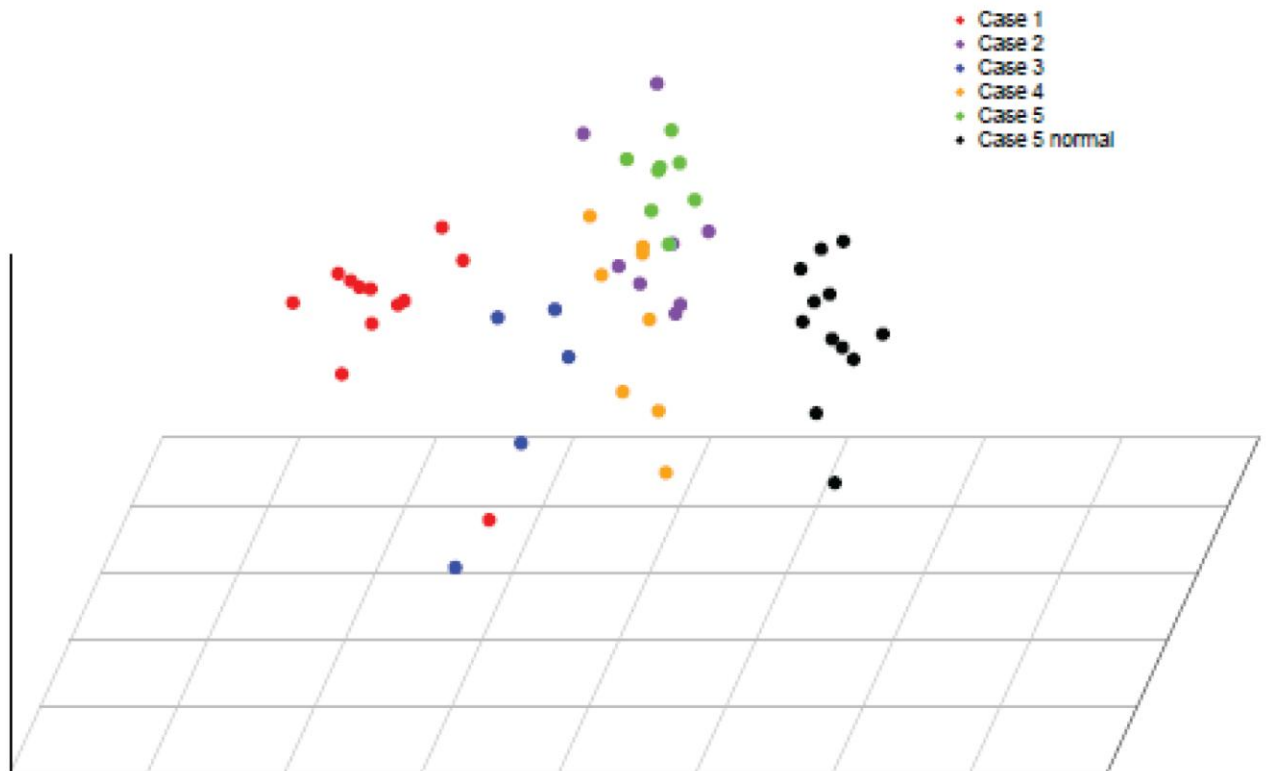

Supplement: mmc4.pdf [file mmc4.pdf]

Supplemental Figure-S5 (Emmert-Buck)

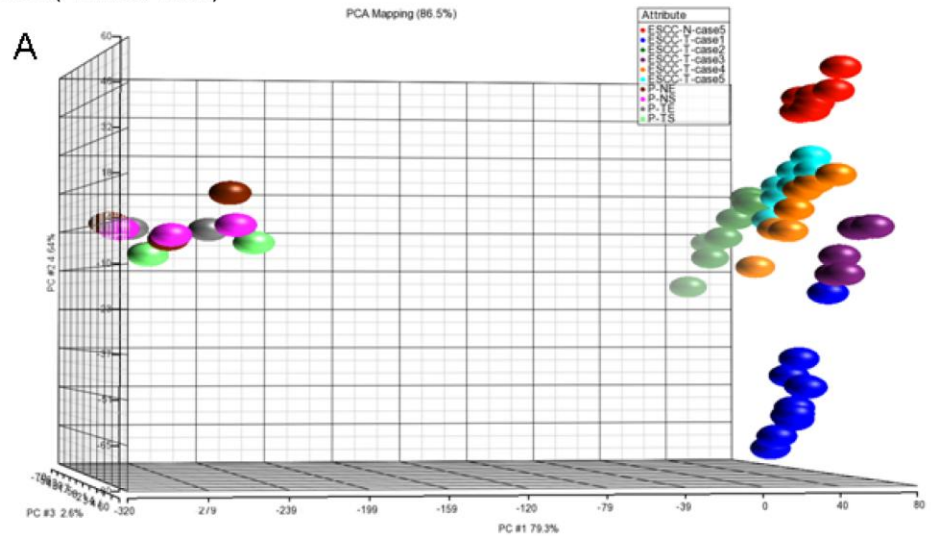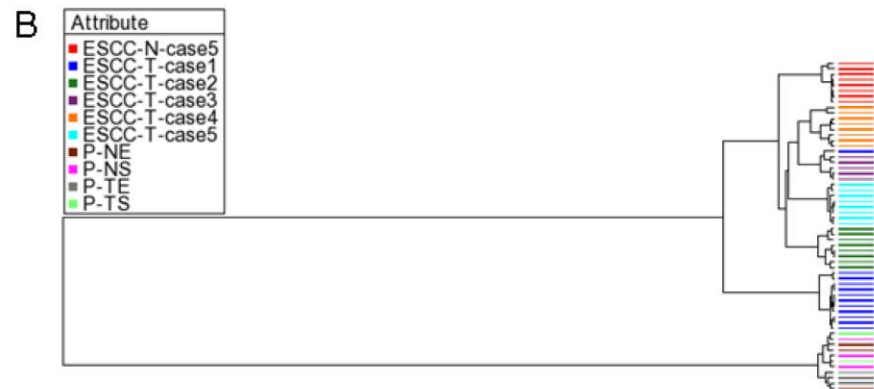

Supplement: mmc5.pdf [file mmc5.pdf]

Supplemental Figure-S6 (Emmert-Buck)

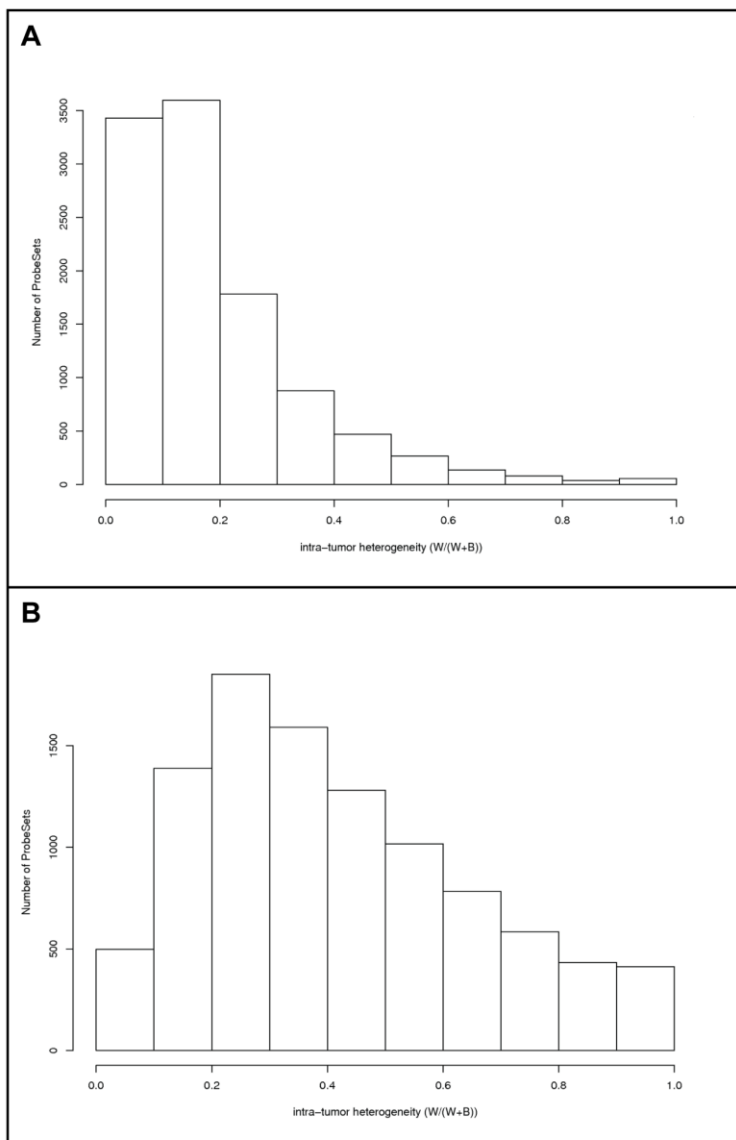

Supplement: mmc6.pdf [file mmc6.pdf]
